# Supplementary material for: Detection of Multiple Variants of Grapevine Fanleaf Virus in Single Xiphinema index Nematodes
Source: MDPI journal article supplement (doi:10.3390/v11121139), 2019-12-10
Supplement: s1 [file s1]

**Table S2.** Relative quantification by RT-qPCR of viruses other than GFLV in grapevines or nematodes.

The vines, virus source plants, are VA6, VA7 and VA8  
ΔCt : Ct Gene of Interest - Ct GAPDH grapevine  
ΔCt : Ct Gene of Interest - Ct Actin Nematode  
rel. Quant: relative quantification compared to GFLV RNA1 accumulation within the same sample  
av.: average of positive samples, with ± corresponding to standard error (SE)  
N/A: Not applicable  
\*: not applicable since sample was negative for GFLV

|           |                            | GFLV       | ArMV          | GVB           | GRVFV         |
|-----------|----------------------------|------------|---------------|---------------|---------------|
| Grapevine | Vines, virus source plants | 3/3        | 1/3           | 2/3           | 1/3           |
|           | av. ΔCt                    | -0.0 ± 0.6 | 3.8           | 2.4 ± 0.5     | 2.2           |
|           | av. rel. Quant.            | 1          | 0.135         | 0.133 ± 0.009 | 0.399         |
| Nematode  | Pool                       | 5/5        | 2/5           | 0/5           | 5/5           |
|           | av. ΔCt                    | 4.8 ± 0.6  | 13.7 ± 3.4    | N/A           | 10.4 ± 1.3    |
|           | av. rel. Quant.            | 1          | 0.005 ± 0.005 | N/A           | 0.190 ± 0.167 |
|           | Single                     | 9/11       | 2/11          | 0/11          | 1/11          |
|           | av. ΔCt                    | 6.7 ± 0.6  | 11.7 ± 1.0    | N/A           | 0.9           |
|           | av. rel. Quant.            | 1          | 0.113 ± 0.111 | N/A           | N/A*          |
