# Supplementary material for: Detection of Multiple Variants of Grapevine Fanleaf Virus in Single Xiphinema index Nematodes
Source: MDPI journal article supplement (doi:10.3390/v11121139), 2019-12-10
Supplement: s1 [file s1]

**Table S1.** List of primers.

| Organism  | Primer name            | Product size (bp) | Sequence                     | Application |
|-----------|------------------------|-------------------|------------------------------|-------------|
| Nematode  | Nem-act-fwd            | 878               | ATCCAAGCTGTGTTGTCCTT         | RT-PCR      |
|           | Nem-act-rev            |                   | CCGCTCTCGTCGTATTCTTG         | RT-PCR      |
|           | Actin-nem-qfwd         | 111               | ACACTGTGCCCATCTATGAAG        | RT-qPCR     |
|           | Actin-nem-qrev         |                   | TAACCACGTTCAGTGAGGATTT       | RT-qPCR     |
| Grapevine | GAPDH-fwd              | 879               | CGATCCATTATCACCCTG           | RT-PCR      |
|           | GAPDH-rev              |                   | ATCACACGGGAGCTGTAACC         | RT-PCR      |
|           | GAPDH-qfwd             | 122               | CAATGAAGGACTGGAGAGGT         | RT-qPCR     |
|           | GAPDH-qrev             |                   | GCCATTCCAGTCAATTTCCC         | RT-qPCR     |
| ArMV      | RNA2-ArMV-3140-fwd     | 416               | CTTTGGGTGGACTTCTCAGCAT       | RT-PCR      |
|           | RNA2-ArMV-3540-rev     |                   | CTTGTTTGCACAAGATTCGGAGC      | RT-PCR      |
|           | RNA2-ArMV-3137-qfwd    | 105               | GGGTGGACTTCTCAGCATTTA        | RT-qPCR     |
|           | RNA2-ArMV-3242-qrev    |                   | GGATTATCTCCAGGTGAACAG        | RT-qPCR     |
| GRSPaV    | GRSPaV-8300-fwd        | 317               | ATGARAATGAAAARTTGCAGCCTTTGA  | RT-PCR      |
|           | GRSPaV-8620-rev        |                   | TTCCAGCGAACAGGCTTAACC        | RT-PCR      |
| GRVfV     | GRVfV-6180-fwd         | 421               | CCCTTCCARTGGGTGCTCTCATAA     | RT-PCR      |
|           | GRVfV-6610-rev         |                   | CTGACCATGCCACGRATCATGA       | RT-PCR      |
|           | GRVfVall-qfwd          | 141               | GAGCTACAAGGTGAATTGCTTCA      | RT-qPCR     |
|           | GRVfVall-qrev          |                   | CGATGGTCATCGCGAGAAGG         | RT-qPCR     |
| GVB       | GVB-7020-fwd           | 398               | CTCAAGGCTCTTTCGAACTGAGG      | RT-PCR      |
|           | GVB-7400-rev           |                   | CGCATTCCAACGGAGCTTTACT       | RT-PCR      |
|           | GVB-qfwd               | 115               | AAACGGTGGTCGGTACATAT         | RT-qPCR     |
|           | GVB-qrev               |                   | GCATTCCAACGGAGCTTTAC         | RT-qPCR     |
| GFLV      | RNA1-GFLV-6405-fwd     | 733               | CTRCCTTGGRGAYGGGATWGG        | RT-PCR/RFLP |
|           | RNA1-GFLV-7140-rev     |                   | GGTTATTTTRADCTTGTTATCCAGTACC | RT-PCR/RFLP |
|           | RNA1-GFLV-q1G5680fwd   | 122               | Vigne et al., 2018*          | RT-qPCR     |
|           | RNA1-GFLV-q1G5802reva  |                   | Vigne et al., 2018           | RT-qPCR     |
|           | RNA1-GFLV-q1G5802revb  |                   | Vigne et al., 2018           | RT-qPCR     |
|           | RNA2-GFLV-ic2G3131fwda | 567               | Vigne et al., 2018           | RT-PCR/RFLP |
|           | RNA2-GFLV-ic2G3131fwdb |                   | Vigne et al., 2018           | RT-PCR/RFLP |
|           | RNA2-GFLV-ic2G3698rev  |                   | Vigne et al., 2018           | RT-PCR/RFLP |

\*Vigne, E.; Garcia, S.; Komar, V.; Lemaire, O.; Hily, J.-M.

Comparison of Serological and Molecular Methods With High-Throughput Sequencing for the Detection and Quantification of Grapevine Fanleaf Virus in Vineyard Samples. *Frontiers in Microbiology* 2018, 9, doi:10.3389/fmicb.2018.02726.
