# Supplementary material for: Detection of Multiple Variants of Grapevine Fanleaf Virus in Single Xiphinema index Nematodes
Source: MDPI journal article supplement (doi:10.3390/v11121139), 2019-12-10
Supplement: s1 [file s1]

(a)

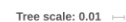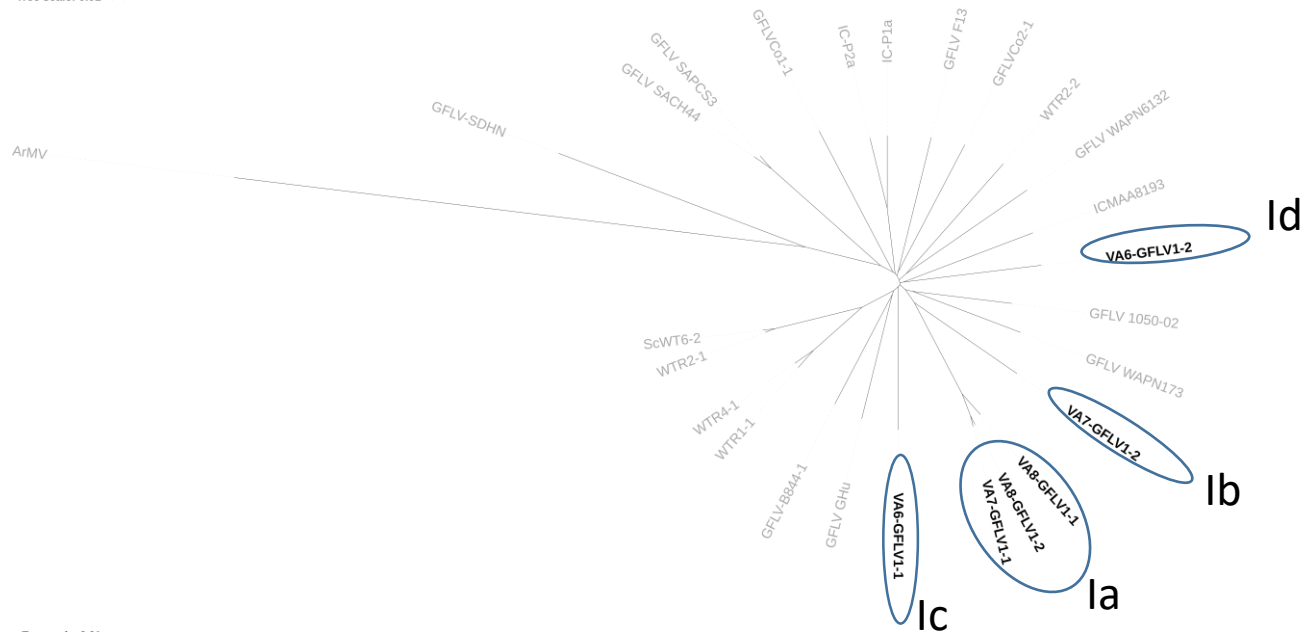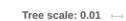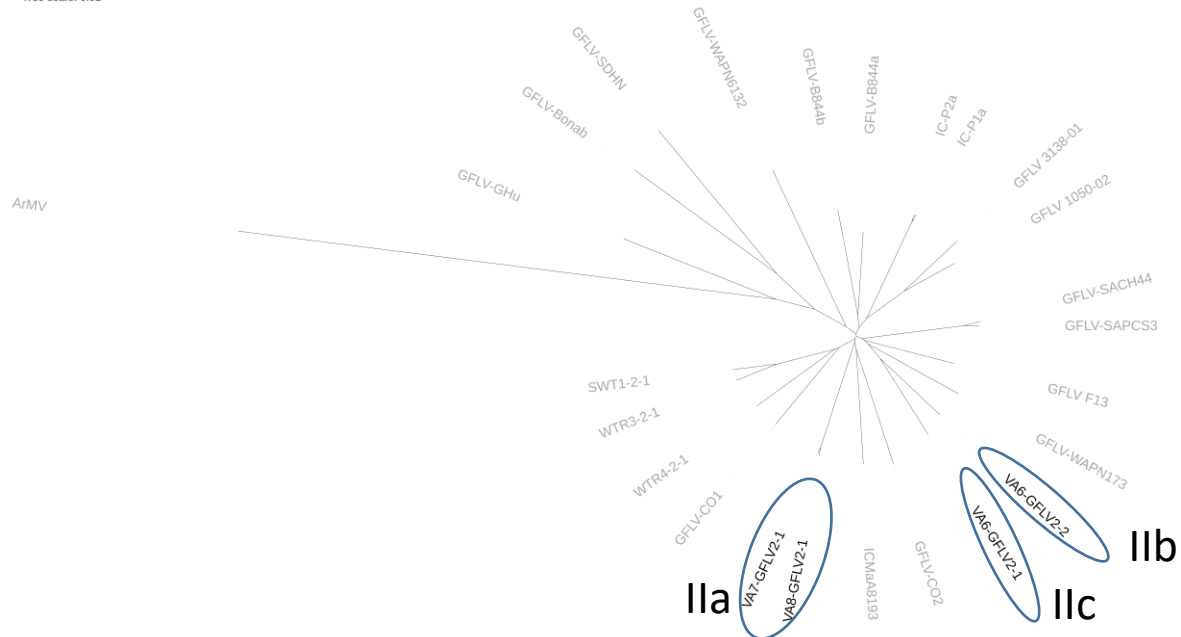

(b)

|             |   | 1     | 2     | 3     | 4     | 5     | 6   |                      |
|-------------|---|-------|-------|-------|-------|-------|-----|----------------------|
| VA7-GFLV1-1 | 1 |       | 75    | 260   | 856   | 882   | 838 | Number of mismatches |
| VA8-GFLV1-2 | 2 | 98,98 |       | 208   | 860   | 890   | 838 |                      |
| VA8-GFLV1-1 | 3 | 96,46 | 97,17 |       | 661   | 917   | 871 |                      |
| VA7-GFLV1-2 | 4 | 88,34 | 88,29 | 91,00 |       | 904   | 861 |                      |
| VA6-GFLV1-1 | 5 | 87,99 | 87,88 | 87,52 | 87,69 |       | 842 |                      |
| VA6-GFLV1-2 | 6 | 88,59 | 88,59 | 88,14 | 88,28 | 88,53 |     |                      |

% of nucleotide identity

|             |   | 1     | 2     | 3     | 4   | Number of mismatches |
|-------------|---|-------|-------|-------|-----|----------------------|
| VA6-GFLV2-1 | 1 |       | 332   | 422   | 434 |                      |
| VA6-GFLV2-2 | 2 | 91,22 |       | 453   | 461 |                      |
| VA7-GFLV2-1 | 3 | 88,84 | 88,01 |       | 37  |                      |
| VA8-GFLV2-1 | 4 | 88,55 | 87,82 | 99,02 |     |                      |

% of nucleotide identity

**Figure S1.** Genetic diversity of GFLV sequences from grapevines VA6, VA7 and V8.

- (a) Phylogenetic trees based on alignments of sequences corresponding to ORF1 (top panel) and ORF2 (lower panel), were reconstructed with the Neighbor Joining (NJ) algorithm with bootstrapping analyses of 1,000 replicates. Name of sequences from VA6, VA7 and VA8 are written in black (with the first number after GFLV corresponding to ARN1 or ARN2 and the last number corresponding to the molecular variant). The names written in grey correspond to sequences from GenBank. The name of clades is the same as in Figure 4.
- (b) Tables displaying mismatch numbers and percentage of nucleotide identity between ORF1 (top panel) and ORF2 (lower panel) nucleotide sequences. Analyses were performed by CLC Workbench software.
