# Supplementary material for: Detection of Multiple Variants of Grapevine Fanleaf Virus in Single Xiphinema index Nematodes
Source: Viruses. 2019 Dec 10;11(12):1139. doi: 10.3390/v11121139 (PMC6950412; doi:10.3390/v11121139)
Supplement: Supplementary file 1 [file viruses-11-01139-s001.zip]

Archive with 5 entries (5 files):
- FigureS1.pdf
- FigureS2.pdf
- FigureS3.pdf
- TableS1.pdf
- TableS2.pdf
